# Supplementary material for: Functional Characterization of Physcomitrella patens Glycerol-3-Phosphate Acyltransferase 9 and an Increase in Seed Oil Content in Arabidopsis by Its Ectopic Expression
Source: PubMed Central journal article supplement (PMC6724121; doi:10.3390/plants8080284), 2019-08-13
Supplement: plants-08-00284-s001.pdf [file plants-08-00284-s001.pdf]

**Supplementary Table S1.** List of DNA primers used in this study.

| <b>Primer name</b> | <b>Sequence (5'-3')</b>       | <b>Purpose</b>            |
|--------------------|-------------------------------|---------------------------|
| PpGPAT9 BamH1 F1   | GGATCCTAATGGAAGGGGACCAGTTC    | Overexpression of PpGPAT9 |
| PpGPAT9 Spe1 R1    | GGACTAGTTTACTGATTTTGAGCTGTTGC |                           |
| PpGPAT9 BamH1 F1   | GGATCCTAATGGAAGGGGACCAGTTC    | Subcellular localization  |
| PpGPAT9 Sal1 R2    | CCGTCGACTTACTGATTTTGAGCTGTTG  |                           |
| PpGPAT9 RT F1      | TAGGACAGAGGCCAATGACCG         | qRT-PCR                   |
| PpGPAT9 RT R1      | GCTGTTCCAGAAGGCATCCAC         |                           |
| PpACT2 RT F1       | GTATTTCTTCTCCATGGCTGG         | qRT-PCR                   |
| PpACT2 RT R1       | CCTCTTCGACTGAGCTTCGT          |                           |
